# Supplementary material for: Adipose derived mesenchymal stem cell-seeded regenerated silk fibroin scaffolds reverse liver fibrosis in mice
Source: Royal Society of Chemistry journal article supplement (doi:10.1039/d5tb00275c), 2025-01-01
Supplement: d5tb00275c1.pdf [file d5tb00275c1.pdf]

## Supporting Information.

### Adipose derived Mesenchymal Stem Cell-Seeded Regenerated Silk Fibroin Reverse Liver Fibrosis in Mice

|                      |                              |                                   |
|----------------------|------------------------------|-----------------------------------|
| <i>Cpt1a</i>         | 5' CAGATACACCAACGGGCTCA3 '   | 5' AATACCAAACGGAGTTGCTTTAC<br>3 ' |
| <i>Slc27a5</i>       | 5' GGTAAGTCACGGCTGGTGC3 '    | 5' CCTTCCAGTTGGCTAGGTGGT3 '       |
| <i>Acadl</i>         | 5' AAGTGATCTCGTGATCGTCGTG3 ' | 5' AGAAATCGCCAACTCAGCAA3 '        |
| <i>Dbi</i>           | 5' CAAGTGGGACTCGTGGAACA3 '   | 5' TACAGAGGGAGGAGGAGCAGA3<br>,    |
| <i>Ppara</i>         | 5' TACTGTCCTTGGTGCCATCCT3 '  | 5' GAAAATTCTATTTGCCCTTCTGT3<br>,  |
| <i>Tnfrsf1<br/>a</i> | 5' CTCCTCAGTGGGTTTCTGG3 '    | 5' CCGCCTTTCTATGCTTGCC3 '         |
| <i>Tnfrsf1<br/>b</i> | 5' TCAGTGGGTAAGGCAGTTTG3 '   | 5' GGGTGGTGGTCAGAGGACA3 '         |

**Table 1.** The sequences of the primers used for CPT1a, Dbi, Ppar, Slc27a5, Tnfrsf1a, and Tnfrsf1b genes.

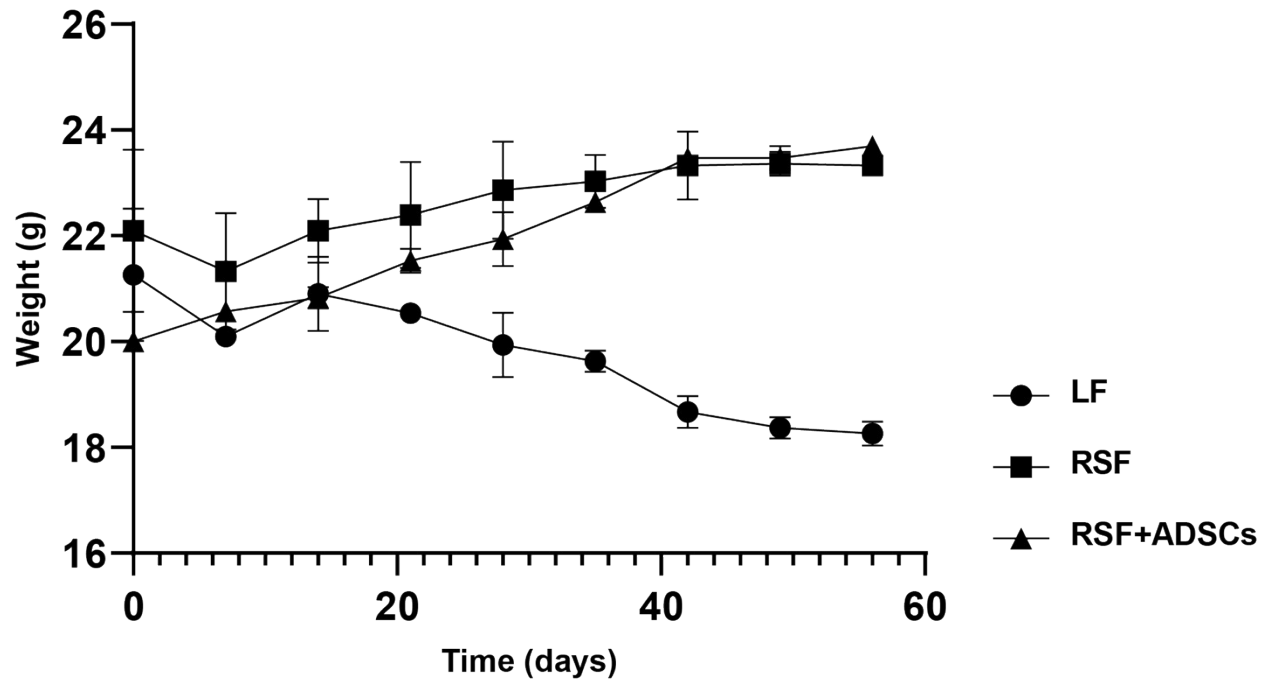

**Fig.1.** The trend of body weight changes in the experimental group and the control group.

HE staining showed that the degree of injury in mi
